# Supplementary material for: Urbanicity is Associated with Behavioral and Emotional Problems in Elementary School-Aged Children
Source: Springer Nature journal article supplement (doi:10.1007/s10826-018-1062-z), 2018-03-29
Supplement: MOESM2 [file 15579820]

Supplementary Table 1

*Differences between sample included in final models and sample of those who were not included in the final models.*

|  | **In final models** | **Not in final models** | **Sample differences** | | |
| --- | --- | --- | --- | --- | --- |
|  | M (SD)/F(%) | M (SD)/F(%) | *t* or χ2 | *p* | *d* or *φ* |
| Behavioral problems | 0.69 (0.54) | 0.83 (0.61) | 3.72 | <.001 | .24 |
| Emotional problems | 0.83 (0.41) | 0.96 (0.48) | 4.38 | <.001 | .29 |
| Urbanicity | 3117.97 (2048.20) | 3447.82 (2024.72) | 2.42 | .02 | .16 |
| SES employment | 0.19 (0.96) | -0.06 (0.98) | -3.89 | <.001 | .26 |
| SES income | -0.04 (0.92) | -0.15 (1.01) | -1.63 | .10 | .11 |
| Family SES (low/average/high) | 28/27/45 | 40/34/26 | 23.93 | <.001 | .19 |
| Gender (male/female) | 50/50 | 49/51 | 0.08 | .77 | -.01 |
| Ethnicity (Dutch/non-western immigrant) | 67/33 | 57/43 | 7.61 | .01 | -.10 |
| Intervention status (intervention/control) | 68/32 | 55/45 | 14.41 | <.001 | .13 |

*Note*. F = frequency; SES = socioeconomic status. Sample sizes differed per model: *n* = 435 included in the final models, *n* = 224 not included in the final models pertaining to family SES, *n* = 291 pertaining to ethnicity, *n* = 460 pertaining to all other comparisons. Urbanicity, SES employment and SES income were measured at the neighborhood level. For continuous variables (i.e., behavioral problems, emotional problems, urbanicity, SES employment and SES income) *t* and *d* statistics are reported, for categorical variables (i.e., family SES, gender, ethnicity and intervention status) χ2 and *φ* statistics are reported.
